# Supplementary material for: Effects of fertilizations on soil bacteria and fungi communities in a degraded arid steppe revealed by high through-put sequencing
Source: PubMed Central journal article supplement (PMC5907784; doi:10.7717/peerj.4623), 2018-04-16

**A**

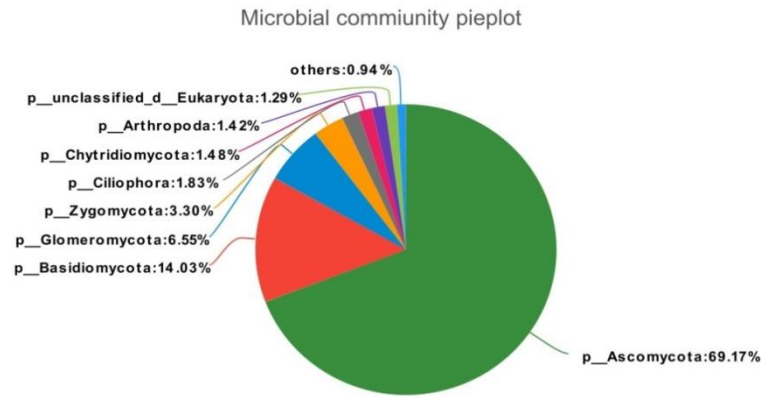

**B**

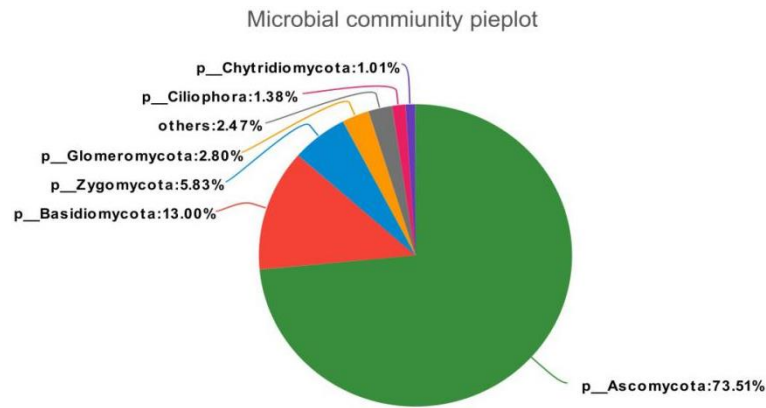

Supplement: peerj-06-4623-s005.pdf [file peerj-06-4623-s005.pdf]
