# Supplementary material for: Effects of fertilizations on soil bacteria and fungi communities in a degraded arid steppe revealed by high through-put sequencing
Source: PeerJ. 2018 Apr 16;6:e4623. doi: 10.7717/peerj.4623 (PMC5907784; doi:10.7717/peerj.4623)
Supplement: Supplemental Information 1 [file peerj-06-4623-s001.xlsx]

## Sheet: Sheet1
	2016.6		2016.7		2016.8		2016.6		2016.7		2016.8		2016.6		2016.7		2016.8		2016.6		2016.7		2016.8		2016.6		2016.7		2016.8		2016.6		2016.7		2016.8		2016.6		2016.7		2016.8		2016.6		2016.7		2016.8		2016.6
treatment	TOC g/kg						Organic matter g/kg						TN g/kg						C/N						AN mg/kg						AP mg/kg						AK mg/kg						pH						MBC mg/kg
	0-10cm	10-20cm	0-10cm	10-20cm	0-10cm	10-20cm	0-10cm	10-20cm	0-10cm	10-20cm	0-10cm	10-20cm	0-10cm	10-20cm	0-10cm	10-20cm	0-10cm	10-20cm	0-10cm	10-20cm	0-10cm	10-20cm	0-10cm	10-20cm	0-10cm	10-20cm	0-10cm	10-20cm	0-10cm	10-20cm	0-10cm	10-20cm	0-10cm	10-20cm	0-10cm	10-20cm	0-10cm	10-20cm	0-10cm	10-20cm	0-10cm	10-20cm	0-10cm	10-20cm	0-10cm	10-20cm	0-10cm	10-20cm	0-10cm
CK	9.68807	8.47706	9.73734	9.45815	9.16819	9.77209	16.7022	14.6145	16.7872	16.3059	15.806	16.8471	0.830856	0.974085	1.05175	0.8715	1.30704	1.09032	11.6604	8.70259	9.25823	10.8527	7.01447	8.96259	100.8	88.2	84	69.3	100.1	79.1	1.50133	0.498949	2.71922	2.5178	3.28329	2.34521	87.6316	42.7156	119	71	102	64	7.67	7.82	8.23	8.29	8.01	8.37	73.1145
	10.4954	7.26606	10.6918	9.04693	9.25054	9.49759	18.0941	12.5267	18.4327	15.5969	15.9479	16.3738	0.914164	0.776436	1.0815	0.8645	1.21632	1.08528	11.4809	9.35821	9.8861	10.4649	7.60535	8.75128	96.6	79.8	75.6	69.3	79.8	74.9	3.25126	1.74806	3.02136	2.31637	2.43901	1.78236	95.7456	42.7156	109	66	93	64	7.77	8	7.66	7.92	7.66	7.87	73.1145
	10.0917	9.2844	11.103	9.86937	9.33289	9.22309	17.3982	16.0063	19.1417	17.0148	16.0899	15.9006	0.87251	0.875261	1.022	0.9135	1.24824	1.08024	11.5663	10.6076	10.864	10.8039	7.47684	8.538	98.7	71.4	107.1	77.7	96.6	88.2	5.99003	3.24983	3.02136	2.71922	4.40899	2.81425	150.921	69	142	97	165	84	8.05	8.14	7.66	7.95	7.67	7.96	98.5411
P	9.2844	7.26606	12.1311	9.86937	11.3093	10.9799	16.0063	12.5267	20.914	17.0148	19.4972	18.9293	0.990192	0.821886	0.8785	0.8505	1.24824	1.05	9.37637	8.84071	13.8089	11.6042	9.06017	10.457	96.6	84	105	90.3	92.4	82.6	3.49438	4.75184	20.0417	4.12919	9.0994	4.22137	99.8026	54.2844	131	59	119	77	7.92	7.88	8.01	8.28	7.82	8.15	300.851
	10.0917	8.27523	11.3087	9.45815	11.4622	10.7289	17.3982	14.2665	19.4961	16.3059	19.7608	18.4967	1.03028	1.00336	0.87675	0.91	1.20624	1.00464	9.79517	8.24754	12.8984	10.3936	9.50242	10.6794	94.5	87.2	94.5	75.6	91	77.7	4.49054	4.24741	16.0132	3.52492	21.1069	8.53655	172	39.156	140	62	133	85	7.66	7.78	7.69	7.87	7.6	7.93	306.433
	9.68807	7.77064	12.9536	9.45815	11.1916	10.2662	16.7022	13.3966	22.3319	16.3059	19.2944	17.6989	0.914891	0.912621	0.875	0.791	1.22724	1.00968	10.5893	8.51464	14.8041	11.9572	9.11935	10.1678	111.3	70.2	92.4	58.8	100.8	73.5	10.9988	3.50311	22.2573	4.83417	15.2907	3.18948	117	66	135	61	259	67	7.66	7.48	7.55	8.41	7.49	7.92	329.015
N	9.63716	8.47706	12.4395	8.6357	10.2936	8.23491	16.6145	14.6145	21.4457	14.888	17.7462	14.197	1.03767	0.937423	1.1375	0.9275	1.2768	1.134	9.28729	9.04294	10.9358	9.31073	8.06205	7.26182	100.8	75.6	96.6	73.5	104.3	67.9	15.2788	8.26145	5.33773	1.7121	2.81425	2.06378	113.596	63.1835	112	75	98	63	7.25	7.74	7.5	7.87	7.57	8.26	145.957
	10.8991	8.19885	12.1311	9.76657	8.7839	8.7839	18.79	14.1348	20.914	16.8376	15.1434	15.1434	1.10297	0.986656	0.9765	0.8925	1.3188	1.281	9.88158	8.30974	12.423	10.9429	6.66052	6.85706	109.2	71.4	115.5	96.6	77	60.9	14.5056	4.4995	2.5178	1.91353	2.62663	1.96997	82.7632	69.4128	100	62	83	52	7.76	7.71	7.54	7.92	7.58	8.71	191.285
	12.0083	8.47706	12.7479	10.8974	11.8034	9.33289	20.7022	14.6145	21.9775	18.7872	20.349	16.0899	1.07032	0.888191	0.973	0.91	1.65984	1.428	11.2193	9.54419	13.1017	11.9752	7.11115	6.53564	100.8	71.4	84	63	129.5	93.8	13.5052	6.00233	3.52492	2.81993	4.22137	2.81425	124.956	59.6239	151	93	205	102	7.72	8	7.07	7.8	7.21	7.75	236.614
NP	10.0917	7.66972	12.1311	7.81325	9.77209	7.68591	17.3982	13.2226	20.914	13.4701	16.8471	13.2505	1.14619	0.938514	1.2425	0.9765	1.3622	1.176	8.80464	8.1722	9.76347	8.00128	7.17375	6.53564	113.4	96.6	119.7	98.7	101.5	73.5	13.2419	3.49961	6.04272	2.41709	8.81798	5.44088	121.711	66.7431	108	40	125	67	7.83	8.06	7.86	8.05	7.44	7.97	291.71
	10.0917	7.66972	10.6918	9.25254	9.0035	7.90551	17.3982	13.2226	18.4327	15.9514	15.522	13.6291	1.17439	0.897259	1.1165	1.064	1.344	1.06848	8.59316	8.54795	9.5762	8.69599	6.69903	7.39884	102.9	88.2	100.8	92.4	96.6	75.6	14.9983	2.24863	14.8047	1.81282	16.7917	8.91178	105.482	74.7523	132	38	168	89	7.56	7.79	7.32	7.88	7.55	7.92	241.968
	9.68807	7.66972	13.5704	8.5329	8.23491	8.12511	16.7022	13.2226	23.3954	14.7107	14.197	14.0077	1.15755	0.927511	1.1795	0.952	1.3804	1.12224	8.36945	8.26914	11.5052	8.96313	5.96559	7.24008	105	65.1	109.2	77.7	123.2	69.3	13.4783	2.74422	12.8911	4.02848	9.94368	7.69228	151.732	66.7431	112	43	149	115	7.85	8.2	7.59	8.18	7.34	7.87	255.901
M	10.7982	9.58624	10.4862	10.3834	10.149	9.77742	18.616	16.5267	18.0782	17.901	17.4969	16.8563	1.09472	0.874277	1.1095	0.9345	1.22617	1.00077	9.86387	10.9648	9.45129	11.1112	8.277	9.76991	86.1	71.4	75.6	81.9	94.5	71.4	3.99956	0.749543	2.61851	1.61139	12.6264	3.96532	181	40.9358	102	54	105	55	7.83	8.08	7.63	7.92	7.55	7.76	219.343
	10.2936	9.68807	10.8974	11.5143	10.149	9.81178	17.7461	16.7022	18.7872	19.8506	17.4969	16.9155	1.10255	0.905998	1.19	1.1095	1.288	1.09245	9.3362	10.6933	9.15751	10.3779	7.87967	8.98148	126	71.4	98.7	111.3	88.2	86.1	14.4695	7.74803	7.25126	2.11495	6.05233	3.54792	148	70.3028	149	80	152	79	7.71	7.89	7.37	7.95	7.47	7.75	146.229
	11.3028	9.2844	11.103	9.25254	10.149	9.74306	19.4859	16.0063	19.1417	15.9514	17.4969	16.797	1.1509	0.956805	1.2705	0.9205	1.16434	0.909091	9.82081	9.70355	8.73912	10.0516	8.71652	10.7174	92.4	75.6	105	77.7	94.08	77.28	12.9727	2.49848	2.81993	2.21566	5.84363	3.33921	99.8026	54.2844	193	70	128	91	7.92	8.16	7.88	8.13	7.46	7.77	292.458
CK	10.0917	8.34251	10.5107	9.45815	9.25054	9.49759	17.3982	14.3825	18.1205	16.3059	15.9479	16.3738	0.87251	0.875261	1.05175	0.883167	1.2572	1.08528	11.5692	9.55613	10.0028	10.7072	7.36556	8.75062	98.7	79.8	88.9	72.1	92.1667	80.7333	3.58087	1.83228	2.92065	2.5178	3.3771	2.31394	111.433	51.4771	123.333	78	120	70.6667	7.83	7.98667	7.85	8.05333	7.78	8.06667	81.59
P	9.68807	7.77064	12.1311	9.59523	11.321	10.6583	16.7022	13.3966	20.914	16.5422	19.5175	18.375	0.978453	0.912621	0.87675	0.8505	1.22724	1.02144	9.92029	8.5343	13.8371	11.3183	9.22731	10.4347	100.8	80.4667	97.3	74.9	94.7333	77.9333	6.3279	4.16745	19.4374	4.16276	15.1657	5.3158	129.601	53.1468	135.333	60.6667	170.333	76.3333	7.74667	7.71333	7.75	8.18667	7.63667	8	312.1
N	10.8482	8.38433	12.4395	9.76657	10.2936	8.7839	18.7022	14.4546	21.4457	16.8376	17.7462	15.1434	1.07032	0.937423	1.029	0.91	1.41848	1.281	10.1294	8.96563	12.1535	10.743	7.27791	6.88484	103.6	72.8	98.7	77.7	103.6	74.2	14.4299	6.25443	3.79348	2.14852	3.22075	2.28267	107.105	64.0734	121	76.6667	128.667	72.3333	7.57667	7.81667	7.37	7.86333	7.45333	8.24	191.285
NP	9.95719	7.66972	12.1311	8.5329	9.0035	7.90551	17.1662	13.2226	20.914	14.7107	15.522	13.6291	1.15938	0.921095	1.1795	0.9975	1.3622	1.12224	8.58908	8.32977	10.2816	8.55347	6.61279	7.05819	107.1	83.3	109.9	89.6	107.1	72.8	13.9062	2.83082	11.2462	2.75279	11.8511	7.34831	126.308	69.4128	117.333	40.3333	147.333	90.3333	7.74667	8.01667	7.59	8.03667	7.44333	7.92	263.193
M	10.7982	9.51957	10.8289	10.3834	10.149	9.77742	18.616	16.4117	18.669	17.901	17.4969	16.8563	1.11605	0.91236	1.19	0.988167	1.22617	1.00077	9.67363	10.4539	9.11597	10.5136	8.29106	9.82292	101.5	72.8	93.1	90.3	92.26	78.26	10.4806	3.66535	4.2299	1.98067	8.17412	3.61748	142.934	55.1743	148	68	128.333	75	7.82	8.04333	7.62667	8	7.49333	7.76	219.343
	0.233059	0.586519	0.404509	0.23742	0.0475442	0.158481	0.401793	1.01116	0.697373	0.409313	0.0819663	0.273221	0.0240489	0.0570562	0.0171762	0.0153007	0.026569	0.00290985	0.051827	0.558758	0.467214	0.121949	0.179419	0.122567	1.21244	4.84974	9.41754	2.8	6.26534	3.92527	1.30621	0.795228	0.100712	0.116292	0.570613	0.298291	19.8826	8.76147	9.76957	9.60902	22.6495	6.66667	0.113725	0.0926163	0.19	0.11865	0.115036	0.153876	8.47554
	0.233059	0.291324	0.47484	0.137075	0.0783272	0.209027	0.401793	0.502242	0.818625	0.236317	0.135036	0.360362	0.0338224	0.0523862	0.00101036	0.0343523	0.0121244	0.0143539	0.355695	0.171515	0.550303	0.473474	0.138609	0.148108	5.28488	5.21579	3.89744	9.1	3.06014	2.62953	2.35308	0.362689	1.82767	0.378322	3.46682	1.63769	21.7731	7.77005	2.60342	0.881917	44.5172	5.20683	0.0866667	0.120185	0.136137	0.16272	0.0970109	0.0750555	8.60985
	0.684951	0.0927365	0.178065	0.652906	0.871645	0.316962	1.18086	0.159878	0.306984	1.12561	1.50272	0.546442	0.01885	0.0284243	0.0542594	0.0101036	0.121288	0.0848705	0.571324	0.358445	0.639583	0.775639	0.41309	0.21009	2.8	1.4	9.15369	9.92421	15.1595	10.0062	0.513381	1.09327	0.825046	0.340705	0.503234	0.267166	12.6051	2.86065	15.3948	8.98765	38.4115	15.1694	0.163741	0.0920748	0.150444	0.034801	0.121701	0.277308	26.1706
	0.134557	0	0.830971	0.415485	0.443746	0.126785	0.231976	1.25607e-15	1.43259	0.716297	0.765019	0.218577	0.00819359	0.0123339	0.0363731	0.0339939	0.0105078	0.0310384	0.125644	0.112625	0.614175	0.286659	0.351421	0.265262	3.2078	9.41754	5.46717	6.22174	8.17333	1.85203	0.550321	0.363715	2.65972	0.661265	2.49157	1.01662	13.5477	2.66972	7.42369	1.45297	12.441	13.8724	0.0935117	0.120324	0.155885	0.0868588	0.0606447	0.0288675	14.8147
	0.291324	0.121203	0.181333	0.652906	0	0.019839	0.502242	0.208955	0.312618	1.12561	0	0.0342025	0.0175682	0.0240353	0.0464767	0.0608011	0.0356968	0.0529299	0.169172	0.383255	0.206634	0.313297	0.24168	0.501805	12.3843	1.4	8.937	10.5698	2.03362	4.27172	3.26919	2.10285	1.5118	0.186913	2.22696	0.184057	23.5761	8.48918	26.2742	7.57188	13.5688	10.583	0.0608276	0.0800694	0.147234	0.0655744	0.02848	0.0057735	42.2126
[truncated: 47 more columns]
