# Supplementary material for: Effects of fertilizations on soil bacteria and fungi communities in a degraded arid steppe revealed by high through-put sequencing
Source: PeerJ journal article supplement (doi:10.7717/peerj.4623), 2018-04-16

**A**

Microbial community pieplot

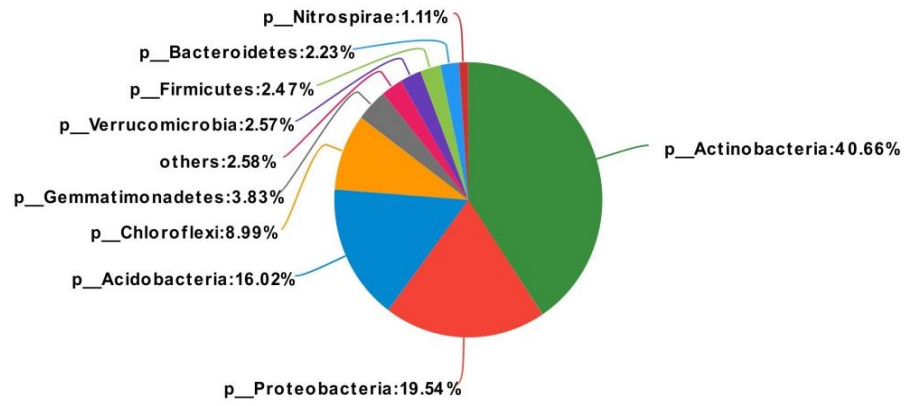

**B**

Microbial community pieplot

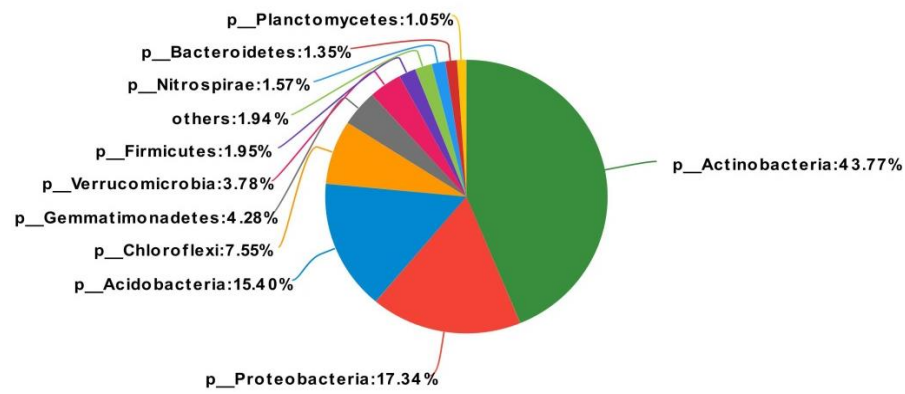

Supplement: Supplemental_figure1.pdf [file Supplemental_figure1.pdf]
